# Supplementary material for: Medications and dosages used in medical assistance in dying: a cross-sectional study
Source: PubMed Central journal article supplement — CMAJ Open. 2022 Jan 18;10(1):E19–26. doi: 10.9778/cmajo.20200268 (PMC8920593; doi:10.9778/cmajo.20200268), 2022-01-18
Supplement: open-2020-0268-original-submission.pdf [file open-2020-0268-original-submission.pdf]

# **Medications and doses used in Medical Assistance In Dying: A National Retrospective Cohort Study**

Igor Stukalin MD<sup>1,#</sup>, Oluwatobi R. Olaiya<sup>2,#</sup>, Viren Naik MD, MEd, MBA<sup>3,4</sup>, Ellen Wiebe MD<sup>5</sup>, Mike Kekewich MSc<sup>3</sup>, Michaela Kelly MD<sup>6</sup>, Laura Wilding RN<sup>3</sup>, Roxanne Halko RN MPH<sup>7</sup>, Dirk Huyer MD<sup>7</sup>, Simon Oczkowski MD MHSc<sup>2,8,9</sup>

## **Author Affiliations**

<sup>1</sup>University of Calgary Department of Medicine, University of Calgary, Calgary, Canada

<sup>2</sup> Michael G. DeGroot School Of Medicine, McMaster University, Hamilton, Canada

<sup>3</sup>The Ottawa Hospital, Ottawa, Canada

<sup>4</sup>Department of Anesthesiology and Pain Medicine, University of Ottawa, Ottawa, Canada

<sup>5</sup>Department of Family Practice, University of British Columbia, Vancouver, Canada

<sup>6</sup>London School of Hygiene and Tropical Medicine, University of London, United Kingdom <sup>7</sup>

<sup>7</sup>Office of The Chief Coroner for Ontario

<sup>8</sup>Department of Medicine, McMaster University, Hamilton Canada

<sup>9</sup>Department of Health Research Methods, Evidence, and Impact, McMaster University, Hamilton, Canada

#Denotes shared co-first authorship

## **Corresponding Author**

Simon Oczkowski MD MHSc MSc FRCPC

Associate Professor, McMaster University

711 Concession St

Hamilton, ON L8V 1C3

E-Mail: [oczkwosj@mcmaster.ca](mailto:oczkwosj@mcmaster.ca)

**Funding:** Dr. Oczkowski is supported by an internal career award from the Department of Medicine at McMaster University.

**Conflicts of Interest:** None

**Tables:** 4

**Figures:** 2

**Word Count:** 2477

**Key Words:** Medical Assistance in Dying, Assisted Dying, Euthanasia, Assisted Suicide, Physician Assisted Suicide

## **Abstract**

**Background:** There is little evidence describing the technical aspects of an assisted death, including medications, doses, and complications.

**Methods:** We conducted a retrospective cohort study of patients who received MAID using data from the Office of the Chief Coroner for Ontario supplemented with chart data from three Canadian centers. We used a parametric survival model for multivariate analysis to identify relationships between medications, doses, and time from procedure start until death.

**Results:** The cohort consisted of 3557 patients, with a mean age of 74 (SD 13) years, 49.8% were female, the majority (72%) having a diagnosis of cancer, with the remainder having cardiovascular/respiratory or neurologic disease. Approximately 45% of patients died in hospital, 49% in the home, and 6% in hospice. The most commonly used medications were midazolam (91%), propofol (99%), and rocuronium (93%). Median time from injection until death was 9 [IQR 6] minutes. Lidocaine (any dose) and high-dose propofol were associated with prolonged time from injection until death. The use of cardiotoxic agents (bupivacaine, potassium chloride) were associated with reduced times until death. Complications occurred in 41 (1%) of MAID deaths, mostly related to venous access or need for a second medication administration.

**Interpretation:** In a large sample of patients who died with medical assistance, certain medications were associated with small differences in times from injection to death and complications were rare. More research is needed to identify the medication protocols which predictable outcomes consistent with patient and family expectations for an assisted death.

## **Introduction**

1  
2  
3 A growing number of countries have decriminalized medical assistance in dying (MAID)  
4  
5 as a means for patients to avoid prolonged suffering(1-4). While the practice of MAID varies  
6  
7 across jurisdictions, it can include voluntary euthanasia, in which a health care provider directly  
8  
9 administers lethal medications, or assisted suicide, in which a lethal medication is made available  
10  
11 to the patient for self-administration(5). Implementation of MAID varies across geographical  
12  
13 areas in Canada and many parts of Europe, both voluntary euthanasia and assisted suicide are  
14  
15 used; Colombia uses voluntary euthanasia only; and Switzerland, the Australian state of Victoria,  
16  
17 and several US states permit assisted suicide only(5-8).  
18  
19  
20  
21

22  
23 Though nearly 7000 Canadians have died with medical assistance, there is scarce  
24  
25 literature on the technical aspects of providing MAID, as the current literature predominantly  
26  
27 explores the ethical issues, eligibility of MAID, and the impact on patients, families, and health  
28  
29 care providers(2,9,10). While the Canadian Association of MAID Assessors and Providers  
30  
31 (CAMAP) has released a guidance document for IV administration, limited data exists on the  
32  
33 specific medications, doses, timing of administration and complications occurring during  
34  
35 clinician-administered MAID(11). Reported complications from jurisdictions outside Canada  
36  
37 include difficulty obtaining IV access, longer-than-expected time to death, pain on injection, and  
38  
39 need for a second MAID medication kit(1,12). These reports indicate complications during  
40  
41 medication administration can cause further patient suffering and distress for families and  
42  
43 clinicians(1,10, 13). Choice of medication and technique of administration may play an  
44  
45 important role in ensuring a comfortable and dignified death. Our study aimed to describe the  
46  
47 medications used in MAID, their impact upon time until death, and the rates of complications, in  
48  
49 order to optimize the technical aspects of providing MAID.  
50  
51  
52  
53  
54  
55  
56  
57  
58  
59  
60

## Methods

### *Data Sources*

This study was reviewed and approved by the Hamilton Integrated Research Ethics Board (HIREB #7902). We performed a retrospective cohort study using de-identified data from the Office of the Chief Coroner for Ontario's MAID Database, which includes information on all Ontarians who have died with medical assistance. As the database from the Office of the Chief Coroner recorded timing of medication administration only up to the end of 2018, we used data from records at three high-volume centers (Hamilton Health Sciences [Hamilton, Ontario], The Ottawa Hospital [Ottawa, Ontario], and Vancouver Coastal Health [Vancouver, British Columbia]) to provide information on IV drug administration timing from 2019 onwards, as these centres' documentation for MAID included information on the timing of medications used when providing MAID (Figure 1).

We collected data on patient characteristics (age, gender, and diagnosis), the location of MAID (home, hospital, or hospice/palliative care facility); type of MAID provider (nurse practitioner, physician specialty); the medications and doses used, and complications. Data regarding physician specialty and setting of MAID provision were not available for patients from Vancouver, Canada. We excluded records for which complete medication dosage and timing data was unavailable or for which oral medications were used for MAID.

### *Outcomes*

The primary outcome measure was length of time until death, starting from the administration of the first medication, as achieving a painless rapid death is a primary objective of MAID. Secondary outcomes included factors associated with complications of MAID, defined as need for a secondary MAID kit, pain or burning on administration, or loss of intravenous access.

### *Statistical Analysis*

1  
2  
3 Data from the chart review were documented in a Microsoft excel file. Binary data were  
4  
5 summarized as counts and percentages. Continuous variables were summarized with mean and standard  
6  
7 deviation (SD) or median and inter-quartile range (IQR), as appropriate. Univariate analysis was  
8  
9 conducted using the log-rank test to identify factors that had a significant association with survival time.  
10  
11 A multilevel mixed-effects parametric survival model with Weibull distribution was used for multivariate  
12  
13 analysis to account for the hierarchal structure of the data (Figure 1). The multivariable model was built  
14  
15 using a combination of statistical metrics (likelihood ratio test) and clinical expertise. Variables included  
16  
17 the administered medication types: pre-medication (typically midazolam), analgesic (typically lidocaine)  
18  
19 anesthetic (propofol and phenobarbital), paralytic (rocuronium and cisatracurium), and cardiotoxic  
20  
21 (bupivacaine and potassium chloride). As medications were generally given at a few discrete standard  
22  
23 dosages, if used, they were categorized into “low,” “standard,” and “high” dosages, rather than treated as  
24  
25 a continuous variable (Table 1). The multivariable model was adjusted for age, sex, and primary care  
26  
27 provider (nurse practitioner [NP] vs medical doctor [MD]). We conducted a complete case analysis and  
28  
29 performed a post-hoc sensitivity analysis excluding patients with time until death exceeding one hour, as  
30  
31 deaths exceeding one hour were judged by the investigators to be exceedingly long and could impact the  
32  
33 relationship between medication and timing of death. The data were analyzed using Stata, version 16  
34  
35 (StataCorp), using  $P < 0.05$  as the threshold for statistical significance.  
36  
37  
38  
39  
40  
41

## 42 **Results**

### 43 *Demographics*

44  
45  
46 We analyzed 3557 adult patients (mean [SD] age, 74 [13] years, range 22 to 105 years) who  
47  
48 received MAID between 2016 to 2020. Patient genders were balanced, 50.2% (1786/3557) male and  
49  
50 49.8% (1770/3557) female. Patients and treatment characteristics are reported in Table 2. 88%  
51  
52 (3113/3557) of the patients included in the study were from Ontario, 16% (444/3557) were from British  
53  
54  
55  
56  
57  
58  
59  
60

1  
2  
3 Columbia. Cancer was the most prevalent primary diagnosis for patients receiving MAID (72%),  
4 followed by cardiovascular/respiratory (24%) and neurological (4%) disease. The location of MAID was  
5 divided into three broad categories: hospital setting; hospice/palliative care facility; or community/other.  
6  
7 Community and other was defined as private residence, retirement home, long-term care, and complex  
8 care centers. Most patients received MAID in the hospital (45%) or in the community (49%). Only 6% of  
9 patients received MAID in a dedicated palliative care facility.  
10  
11  
12  
13  
14  
15  
16  
17  
18

### 19 *Medications Used in MAID*

20  
21  
22 The IV medications and the dosages used to perform MAID are summarized in Table 3.  
23  
24 Midazolam was the most common pre-medication sedative used in the provision of MAID, received by  
25 91% of patients (median dose 10 mg; IQR = 10 mg; range 0-70 mg), though a few patients received  
26 metoclopramide (n=4). 70% (2477/3557) of patients received lidocaine as an analgesic (median dose 40  
27 mg; IQR 20; range 2-1000); one received magnesium sulphate as an analgesic. 21 patients received an  
28 opioid (morphine, hydromorphone, or fentanyl). In regard to anaesthetic medications, 85% (2999/3538)  
29 of the patients received propofol 1000 mg (median 1000 mg; IQR 0; range 1-3000 mg), while four  
30 patients in the entire sample received phenobarbital, all at a dose of 3000 mg. Rocuronium was the most  
31 commonly used paralytic, with 81% (2832/3486) of the reported sample receiving a dose of 200 mg  
32 (median 200, IQR 0; range 10-400 mg). Of those receiving cisatracurium, 98% (252/258) received a dose  
33 between 30 to 40 mg. 24% (863/3557) of patients received cardiotoxic medications, most commonly  
34 bupivacaine (n = 582; median 400 mg; IQR 0; range 20-2000). Only 4% of patients received potassium  
35 chloride (n=129, median 80 mEq; IQR 0; range 10-1000 mEq).  
36  
37  
38  
39  
40  
41  
42  
43  
44  
45  
46  
47  
48  
49

### 50 *Length of MAID*

51  
52  
53 The median (IQR) length of time from the initiation of MAID until death was nine minutes (IQR  
54 = 6). The shortest documented MAID procedure was one minute, and the longest documented MAID was  
55  
56  
57  
58  
59  
60

1  
2  
3 121 minutes. In univariate analysis, we used Kaplan-Meier survival curves for each medication used in  
4 MAID to explore which medications were associated longer deaths (Appendix Figure 1). The median  
5 survival increased from nine to 12 minutes when patients received high dose propofol compared to the  
6 standard dose ( $p < 0.001$ ). Patients who received low and standard doses of lidocaine had a median  
7 survival time of 9 and 10 minutes respectively, compared to the eight minutes median survival for those  
8 who did not receive any lidocaine (Figure 1). The median difference in procedure time between patients  
9 who did not receive any bupivacaine and those that received low, standard, and high doses was one  
10 minute. Patients who received a standard dose of potassium chloride had a median survival of two  
11 minutes less than those who did not receive potassium chloride. The median length of MAID was  
12 increased by four, two, and one minute in those who received low and standard dose midazolam  
13 compared to those who did not receive midazolam at all.

14  
15  
16  
17  
18  
19  
20  
21  
22  
23  
24  
25  
26  
27 The Kaplan-Meier survival estimates were plotted against the log of time and followed a linear  
28 trend which indicated the Weibull model was appropriate for the data. Results from the multivariate  
29 analysis are reported in Table 4. After adjusting for the other medications, high dose propofol maintained  
30 a statistically significant relationship with length of time from medication administration until death  
31 (hazard ratio [HR] = 0.4;  $p \leq 0.001$ , 95% CI = 0.3 to 0.7). In multivariate analysis, patients who received  
32 lidocaine were associated with having prolonged lengths of MAID compared to those who did not receive  
33 lidocaine as part of the MAID medication regimen (low dose lidocaine HR = 0.8,  $p = 0.097$ , 95% CI = 0.6  
34 to 1; standard dose lidocaine HR = 0.6,  $p < 0.001$ , 95% CI = 0.6 to 0.7; high dose lidocaine = 0.8,  $p =$   
35 0.009, 95% CI = 0.7 to 0.9). In regard to the paralytics, the standard dosages of cisatracurium and  
36 rocuronium were associated with the same effect on the length of MAID (standard cisatracurium dose HR  
37 = 1.0,  $p = 0.661$ , 95% CI = 0.9 to 1). The most commonly used cardiotoxic, bupivacaine 400mg  
38 intravenous ( $n = 429$ ), was associated with shorter MAID times (HR = 1.2,  $p = 0.013$ , CI = 1 to 1.3).  
39 Standard dose of potassium chloride was not associated with shorter MAID time (HR = 1.2,  $p = 0.197$ , CI  
40 = 0.9 to 1.4).  
41  
42  
43  
44  
45  
46  
47  
48  
49  
50  
51  
52  
53  
54  
55  
56  
57  
58  
59  
60

### *Sensitivity Analysis*

A survival analysis excluding patients with death timing longer than one hour was conducted (n=2,566). There was no difference in the associations between length of MAID and dosages used except for potassium chloride. After removing patients with greater than one hour from first injection until death, the relationship was statistically significant (HR = 1.5, p < 0.001, CI = 1.2 to 1.9).

### *Complications*

There were 41 complications reported, after review, the reported complications fell into one of two main categories. The most common complication documented was related to obtaining IV access or loss of IV access after initiating the procedure (n = 23). Sixteen of 2570 patients experienced prolonged time to death requiring a second kit. There were no reported complications related to the specific medications used in the provision of MAID, and insufficient number of complications to assess association with provider type or setting of MAID.

### **Discussion**

To our knowledge, this study is the first large cohort evaluating medications, dosages and complications of MAID in Canada. The population included in the study is similar to that described across Canada and elsewhere, with an older population, roughly equal gender balance, and cancer being the most prevalent diagnosis among those who receive MAID(14-15). As expected, based upon previous literature review and CAMAP guidance documents, midazolam



1  
2  
3 was the only sedative used, lidocaine was the most common analgesic, propofol was the most  
4  
5 common anesthetic, and rocuronium was the most common paralytic(1,11).  
6  
7

8 High-dose propofol and rocuronium were counter-intuitively associated with a longer  
9  
10 time until death. This may be because higher doses of these medications were used in cases  
11  
12 where an initial injection was thought to be inadequate, either due to reduced effectiveness or  
13  
14 concerns about IV placement. It is also possible the prolonged time to death with high-dose  
15  
16 propofol is due to unreported or unrecognized technical complications, as clinicians used a  
17  
18 second backup kit without it being reported as a complication. Alternatively, the higher dose of  
19  
20 medication may take longer to inject and thus increase the duration of the procedure.  
21  
22  
23

24 Lidocaine was also associated with longer duration between initial injection until death.  
25  
26 Patients that received lidocaine took on average approximately one minute longer to die than  
27  
28 those who did not receive lidocaine. This could be for several reasons. It could be due to  
29  
30 procedural factors, such as the increased time needed to inject and flush the medication itself, or  
31  
32 because clinicians concerned about discomfort, administer lidocaine and infuse propofol more  
33  
34 slowly. It may also be due to the anti-arrhythmic effects of lidocaine, which could prolong the  
35  
36 time until cardiac arrest(16). Pain on injection was a very rare complication ( $n = 2$ ), either due to  
37  
38 underreporting or low incidence. If the latter, it suggests lidocaine may not be necessary, and  
39  
40 contributes to a short, but potentially unnecessarily prolonged time until death.  
41  
42  
43  
44  
45

46 While cardiotoxic agents were used in a minority of MAID provisions, it appears their  
47  
48 use is associated with hastened death. Potassium chloride decreases the membrane resting  
49  
50 potential of cardiac cells, thus preventing myocardial repolarization and bupivacaine blocks  
51  
52 sodium channels throughout the heart and leads to acute conduction disturbances. In our study,  
53  
54 there was an association between both cardiotoxic agents, bupivacaine and potassium chloride  
55  
56  
57  
58  
59  
60

1  
2  
3 and a shortened time until death. The relationship between bupivacaine and time until death was  
4 statistically significant in both the primary and sensitivity analysis.  
5  
6  
7

8 Reassuringly, reports of adverse events were rare. The complications in this cohort were  
9 mainly related to intravenous access. Identifying patients who may have potentially difficult  
10 vascular access prior to the initiation of MAID and then acquiring the most skilled providers to  
11 insert the intravenous line may minimize unnecessary discomfort. As the dataset was repurposed  
12 for analysis, it is possible other technical complications (e.g. patient discomfort, seizures,  
13 anaphylaxis) were not reported or captured in this analysis. As the Office of the Chief Coroner  
14 for Ontario routinely speaks with patients' families after a MAID death, any major complications  
15 unrecognized by clinicians may be reported by families, and these would have been captured in  
16 the dataset. Thus, it is reassuring that complications are either very uncommon or insufficiently  
17 troubling to clinicians, patients, and families to even be recognized as such.  
18  
19  
20  
21  
22  
23  
24  
25  
26  
27  
28  
29  
30  
31

32 Our study has several strengths, including the its large and multicenter sample, which  
33 increases the generalizability of our findings. However, several limitations must be considered.  
34 First, as a retrospective cohort study, unmeasured confounding limits any inferences of causation  
35 regarding the effects of the medications used in MAID. Second, the clinical information was  
36 collected and repurposed for this retrospective cohort study, as such, the data were at risk for  
37 errors during data collection and extraction phases. The lack of standardization of data collection  
38 by clinicians across sites in the Office of the Chief Coroner database may have resulted in  
39 underreporting of complications, despite mandatory reporting to the Office of the Chief Coroner  
40 for patients in Ontario.  
41  
42  
43  
44  
45  
46  
47  
48  
49  
50  
51  
52

53 This study primarily describes MAID care in Canada. In order to effectively evaluate the  
54 therapies used to perform MAID and the patient experience, the outcomes evaluated must be  
55  
56  
57  
58  
59  
60

1  
2  
3 defined as importance to patients and their families. To the investigators' knowledge, there is no  
4  
5 patient reported outcome measure evaluating the technical quality of MAID from the patient and  
6  
7 family perspective, though efforts are ongoing(17, 18). Future research should explore patient  
8  
9 preferences including the preferred length and setting for a "good death" in the context of MAID,  
10  
11 to ensure clinicians use medications which result in predictable outcomes consistent with patient  
12  
13 and family expectations for an assisted death.  
14  
15  
16  
17  
18  
19  
20  
21  
22  
23  
24  
25  
26  
27  
28  
29  
30  
31  
32  
33  
34  
35  
36  
37  
38  
39  
40  
41  
42  
43  
44  
45  
46  
47  
48  
49  
50  
51  
52  
53  
54  
55  
56  
57  
58  
59  
60

Confidential

**Table 1. Categorization of dosages**

|                                  | Dosage range | N    |
|----------------------------------|--------------|------|
| <b><u>Midazolam (mg)</u></b>     |              |      |
| None                             | 0            | 192  |
| Low dose                         | 1 to 9       | 122  |
| Standard dose                    | 10 to 19     | 1595 |
| High dose                        | > 19         | 661  |
| <b><u>Lidocaine (mg)</u></b>     |              |      |
| None                             | 0            | 420  |
| Low dose                         | 1 to 39      | 67   |
| Standard dose                    | 40 to 60     | 1849 |
| High dose                        | > 60         | 239  |
| <b><u>Cisatracurium (mg)</u></b> |              |      |
| None                             | 0            | 2389 |
| Low dose                         | 1 to 29      | 1    |
| Standard dose                    | 30 to 40     | 159  |
| High dose                        | > 40         | 3    |
| <b><u>Rocuronium (mg)</u></b>    |              |      |
| None                             | 0            | 163  |

|   |              |            |      |
|---|--------------|------------|------|
| 1 |              |            |      |
| 2 |              |            |      |
| 3 |              |            |      |
| 4 | Low dose     | 1 to 149   | 267  |
| 5 |              |            |      |
| 6 | Average dose | 150 to 200 | 2108 |
| 7 |              |            |      |
| 8 | High dose    | > 200      | 14   |
| 9 |              |            |      |

10

11

12

13 **Bupivacaine (mg)**

|    |               |          |      |
|----|---------------|----------|------|
| 14 |               |          |      |
| 15 | None          | 0        | 2041 |
| 16 |               |          |      |
| 17 | Low dose      | 1 to 399 | 89   |
| 18 |               |          |      |
| 19 | Standard dose | 400      | 429  |
| 20 |               |          |      |
| 21 | High dose     | > 400    | 11   |
| 22 |               |          |      |
| 23 |               |          |      |
| 24 |               |          |      |
| 25 |               |          |      |
| 26 |               |          |      |

27 **Potassium Chloride (mEq)**

|    |               |         |      |
|----|---------------|---------|------|
| 28 |               |         |      |
| 29 | None          | 0       | 2470 |
| 30 |               |         |      |
| 31 | Low dose      | 1 to 79 | 5    |
| 32 |               |         |      |
| 33 | Standard dose | 80      | 90   |
| 34 |               |         |      |
| 35 | High dose     | > 80    | 5    |
| 36 |               |         |      |
| 37 |               |         |      |
| 38 |               |         |      |
| 39 |               |         |      |
| 40 |               |         |      |

41 **Propofol (mg)**

|    |               |        |      |
|----|---------------|--------|------|
| 42 |               |        |      |
| 43 | None          | 0      | 34   |
| 44 |               |        |      |
| 45 | Low dose      | < 1000 | 409  |
| 46 |               |        |      |
| 47 | Standard dose | 1000   | 2999 |
| 48 |               |        |      |
| 49 | High dose     | > 1000 | 96   |
| 50 |               |        |      |
| 51 |               |        |      |
| 52 |               |        |      |
| 53 |               |        |      |
| 54 |               |        |      |
| 55 |               |        |      |
| 56 |               |        |      |
| 57 |               |        |      |
| 58 |               |        |      |
| 59 |               |        |      |
| 60 |               |        |      |

**Table 2. Baseline Characteristics of MAID patients from 2016 to 2020**

| N = 2570                                        |             |
|-------------------------------------------------|-------------|
| Age                                             |             |
| Mean (sd), yr                                   | 74 (13)     |
| Profession – n (%)                              |             |
| MD                                              | 3304 (93%)  |
| NP                                              | 240 (7%)    |
| Gender – n (%)                                  |             |
| Male                                            | 1786 (50%)  |
| Female                                          | 1770 (50%)  |
| Center – n (%)                                  |             |
| Inpatient                                       | 1382 (45%)  |
| Hospice or Palliative Care Facility             | 187 (6%)    |
| Community & Other (e.g. private residence, LTC) | 1,537 (49%) |
| Patient Diagnosis – n (%)                       |             |
| Cancer                                          | 2519 (72%)  |
| Neurological                                    | 23 (0.7%)   |
| Cardiovascular/Respiratory                      | 840 (24%)   |

|    |                           |            |
|----|---------------------------|------------|
| 1  |                           |            |
| 2  |                           |            |
| 3  |                           |            |
| 4  | Other                     | 126 (4%)   |
| 5  |                           |            |
| 6  |                           |            |
| 7  |                           |            |
| 8  | Medical Specialty – n (%) |            |
| 9  |                           |            |
| 10 | Family                    | 1391 (49%) |
| 11 |                           |            |
| 12 | Anesthesia                | 473 (17%)  |
| 13 |                           |            |
| 14 | Critical Care             | 95 (3%)    |
| 15 |                           |            |
| 16 | Emergency                 | 96 (3%)    |
| 17 |                           |            |
| 18 | Internal medicine         | 290 (10%)  |
| 19 |                           |            |
| 20 | Neurology                 | 12 (0.4%)  |
| 21 |                           |            |
| 22 | Oncology                  | 1 (0.04%)  |
| 23 |                           |            |
| 24 | Other                     | 10 (0.4%)  |
| 25 |                           |            |
| 26 | Palliative Care           | 382 (14%)  |
| 27 |                           |            |
| 28 | Radiation Oncology        | 31 (1%)    |
| 29 |                           |            |
| 30 | Surgery                   | 47 (2%)    |
| 31 |                           |            |
| 32 |                           |            |
| 33 |                           |            |
| 34 |                           |            |
| 35 |                           |            |
| 36 |                           |            |
| 37 |                           |            |
| 38 |                           |            |
| 39 |                           |            |
| 40 |                           |            |
| 41 |                           |            |
| 42 |                           |            |
| 43 |                           |            |
| 44 |                           |            |
| 45 |                           |            |
| 46 |                           |            |
| 47 |                           |            |
| 48 |                           |            |
| 49 |                           |            |
| 50 |                           |            |
| 51 |                           |            |
| 52 |                           |            |
| 53 |                           |            |
| 54 |                           |            |
| 55 |                           |            |
| 56 |                           |            |
| 57 |                           |            |
| 58 |                           |            |
| 59 |                           |            |
| 60 |                           |            |

Confidential

**Table 3. Medications and dosages used to perform MAID**

| <b><u>Sedative (Midazolam)</u></b> | <b>Median</b> | <b>IQR</b> | <b>min</b> | <b>max</b> |
|------------------------------------|---------------|------------|------------|------------|
| Total                              | 10            | 10         | 1          | 70         |
| % of patients with dose = 0 mg     | 9%            |            |            |            |
| <b><u>Analgesic</u></b>            |               |            |            |            |
| <b>Lidocaine</b>                   | <b>Median</b> | <b>IQR</b> | <b>min</b> | <b>max</b> |
| Total                              | 40            | 20         | 2          | 1000       |
| % of patients with dose = 0 mg     | 18%           |            |            |            |
| <b><u>Anesthetics</u></b>          |               |            |            |            |
| <b>Propofol</b>                    | <b>Median</b> | <b>IQR</b> | <b>min</b> | <b>max</b> |
| Total                              | 1000          | 0          | 1          | 3000       |
| <b>Phenobarbital</b>               | <b>Median</b> | <b>IQR</b> | <b>min</b> | <b>max</b> |
| Total                              | 1000          | 0          | 3000       | 3000       |
| % of patients with dose = 0 mg     | 0%            |            |            |            |
| <b><u>Paralytics</u></b>           |               |            |            |            |
| <b>Rocuronium</b>                  | <b>Median</b> | <b>IQR</b> | <b>min</b> | <b>max</b> |
| Total                              | 200           | 0          | 10         | 400        |
| <b>Cisatracurium</b>               | <b>Median</b> | <b>IQR</b> | <b>min</b> | <b>max</b> |
| Total                              | 40            | 10         | 20         | 80         |
| % of patients with dose = 0 mg     | 0%            |            |            |            |
| <b><u>Cardiotoxic</u></b>          |               |            |            |            |



|                                |               |            |            |            |
|--------------------------------|---------------|------------|------------|------------|
| <b>Bupivacaine</b>             | <b>Median</b> | <b>IQR</b> | <b>min</b> | <b>max</b> |
| Overall                        | 400           | 0          | 20         | 2000       |
| <b>Potassium Chloride</b>      | <b>Median</b> | <b>IQR</b> | <b>min</b> | <b>max</b> |
| Overall                        | 80            | 0          | 10         | 1000       |
| % of patients with dose = 0 mg | 76%           |            |            |            |

**Table 4. Multivariate Survival Analysis of Weibull Parametric Model with Medications and Dosages**

|                                                      | Hazard Ratio | P       | 95% CI     | Median length (sec) * |
|------------------------------------------------------|--------------|---------|------------|-----------------------|
| <b>Lidocaine (ref = no dose)</b>                     |              |         |            | 480                   |
| Low dose (1 to 39 mg)                                | 0.8          | 0.097   | 0.6 to 1   | 600                   |
| Standard dose (40 to 60 mg)                          | 0.6          | < 0.001 | 0.6 to 0.7 | 540                   |
| High dose (> 60 mg)                                  | 0.8          | 0.009   | 0.7 to 0.9 | 480                   |
| <b>Propofol (ref = Low dose [Less than 1000 mg])</b> |              |         |            | 480                   |
| No dose                                              | 1.4          | 0.537   | 0.5 to 1   | 570                   |
| Standard dose (1000 mg)                              | 0.9          | 0.399   | 0.8 to 1   | 540                   |
| High dose (> 1000mg)                                 | 0.4          | < 0.001 | 0.3 to 0.5 | 720                   |

|    |                                                  |     |       |            |      |
|----|--------------------------------------------------|-----|-------|------------|------|
| 1  |                                                  |     |       |            |      |
| 2  |                                                  |     |       |            |      |
| 3  | <b>Paralytic (ref = Rocuronium standard dose</b> |     |       |            | 540  |
| 4  | [150 to 200 mg])                                 |     |       |            |      |
| 5  |                                                  |     |       |            |      |
| 6  |                                                  |     |       |            |      |
| 7  | <b>Rocuronium</b>                                |     |       |            |      |
| 8  |                                                  |     |       |            |      |
| 9  | Low dose (1 to 149 mg)                           | 0.9 | 0.227 | 0.8 to 1   | 540  |
| 10 |                                                  |     |       |            |      |
| 11 | High dose (> 200 mg)                             | 0.4 | 0.002 | 0.3 to 0.7 | 870  |
| 12 |                                                  |     |       |            |      |
| 13 |                                                  |     |       |            |      |
| 14 | <b>Cisatracurium</b>                             |     |       |            |      |
| 15 |                                                  |     |       |            |      |
| 16 | Standard dose (30 to 40 mg)                      | 1.0 | 0.661 | 0.9 to 1   | 540  |
| 17 |                                                  |     |       |            |      |
| 18 | Low dose (1 to 29 mg)                            | 0.8 | 0.810 | 0.1 to 5.6 | 840  |
| 19 |                                                  |     |       |            |      |
| 20 |                                                  |     |       |            |      |
| 21 | High dose (> 40 mg)                              | 0.4 | 0.124 | 0.1 to 1.3 | 1020 |
| 22 |                                                  |     |       |            |      |
| 23 |                                                  |     |       |            |      |
| 24 |                                                  |     |       |            |      |
| 25 | <b>Bupivacaine (ref = no dose)</b>               |     |       |            | 540  |
| 26 |                                                  |     |       |            |      |
| 27 | Low dose (1 to 399 mg)                           | 1.0 | 0.672 | 0.8 to 1.3 | 480  |
| 28 |                                                  |     |       |            |      |
| 29 |                                                  |     |       |            |      |
| 30 | Standard dose (400 mg)                           | 1.2 | 0.013 | 1 to 1.3   | 480  |
| 31 |                                                  |     |       |            |      |
| 32 | High dose (> 400 mg)                             | 0.7 | 0.197 | 0.4 to 1.2 | 480  |
| 33 |                                                  |     |       |            |      |
| 34 |                                                  |     |       |            |      |
| 35 |                                                  |     |       |            |      |
| 36 | <b>Potassium Chloride (ref = no</b>              |     |       |            | 540  |
| 37 | <b>dose)</b>                                     |     |       |            |      |
| 38 |                                                  |     |       |            |      |
| 39 |                                                  |     |       |            |      |
| 40 | Low dose (1 to 79 mg)                            | 1.3 | 0.587 | 0.5 to 3.5 | 600  |
| 41 |                                                  |     |       |            |      |
| 42 | Standard dose (80 mg)                            | 1.2 | 0.197 | 0.9 to 1.4 | 420  |
| 43 |                                                  |     |       |            |      |
| 44 | High dose (> 80 mg)                              | 0.7 | 0.391 | 0.3 to 1.6 | 840  |
| 45 |                                                  |     |       |            |      |

\*unadjusted for covariates

## References

1. Zworth M, Saleh C, Ball I, et al. Provision of medical assistance in dying: a scoping review. *BMJ Open*. 2020;10(7):e036054. Published 2020 Jul 8. doi:10.1136/bmjopen-2019-036054
2. Euthanasia, Ethics and Public Policy: An Argument against Legalisation - John Keown - Google Books [Internet]. [cited 2020 May 3]. Available from: [https://books.google.ca/books?hl=en&lr=&id=2r9tDwAAQBAJ&oi=fnd&pg=PR9&dq=euthanasia+ethics&ots=\\_fPT-5oHoB&sig=xxZ9XwIHUsmm5w72ZI7HAjYISvI#v=onepage&q=euthanasia+ethics&f=false](https://books.google.ca/books?hl=en&lr=&id=2r9tDwAAQBAJ&oi=fnd&pg=PR9&dq=euthanasia+ethics&ots=_fPT-5oHoB&sig=xxZ9XwIHUsmm5w72ZI7HAjYISvI#v=onepage&q=euthanasia+ethics&f=false)
3. Regulations for the Monitoring of Medical Assistance in Dying [Internet]. [cited 2020 May 3]. Available from: <https://laws-lois.justice.gc.ca/eng/regulations/SOR-2018-166/index.html>
4. Emanuel EJ, Onwuteaka-Philipsen BD, Urwin JW, Cohen J. Attitudes and Practices of Euthanasia and Physician-Assisted Suicide in the United States, Canada, and Europe. *JAMA*. 2016 Jul 5;316(1):79.
5. Medical Assistance in Dying: The Law in Selected Jurisdictions Outside Canada.
6. Quill TE. Legal Regulation of Physician-Assisted Death — The Latest Report Cards. *N Engl J Med*. 2007 May 10;356(19):1911–3.
7. Hedberg K, New C. Oregon’s Death With Dignity Act: 20 Years of Experience to Inform the Debate. *Ann Intern Med*. 2017 Oct 17;167(8):579.
8. Government Bill (House of Commons) C-14 (42-1) - Royal Assent - An Act to amend the Criminal Code and to make related amendments to other Acts (medical assistance in dying) - Parliament of Canada [Internet]. [cited 2020 May 3]. Available from: <https://www.parl.ca/DocumentViewer/en/42-1/bill/C-14/royal-assent>
9. A Guide for Reflection on Ethical Issues Concerning Assisted Suicide and Voluntary Euthanasia.
10. Ganzini L, Nelson HD, Schmidt TA, Kraemer DF, Delorit MA, Lee MA. Physicians’ Experiences with the Oregon Death with Dignity Act. *N Engl J Med*. 2000 Feb 24;342(8):557–63.
11. Canada. Health Canada. Fourth interim report on medical assistance in dying in Canada. 12 p.
11. Canadian Association of MAID Assessors and Providers: Clinical Practice Guideline.
12. Groenewoud JH, van der Heide A, Onwuteaka-Philipsen BD, Willems DL, van der Maas PJ, van der Wal G. Clinical Problems with the Performance of Euthanasia and Physician-Assisted Suicide in the Netherlands. *N Engl J Med*. 2000 Feb 24;342(8):551–6.
13. Hendin H, Rutenfrans C, Zyllicz Z. Physician-assisted suicide and euthanasia in the Netherlands. Lessons from the Dutch. *JAMA*. 1997 Jun 4;277(21):1720–2.

- 1  
2  
3 14. Wu JSY, Pinilla J, Watson M, Verma S, Olivotto IA. Medical assistance in dying for cancer  
4 patients one year after legalization: a collaborative approach at a comprehensive cancer centre.  
5 Curr Oncol. 2018;25(5):e486.  
6  
7 15. Meier DE, Emmons C-A, Litke A, Wallenstein S, Morrison RS. Characteristics of Patients  
8 Requesting and Receiving Physician-Assisted Death. Arch Intern Med. 2003 Jul 14;163(13):1537.  
9  
10 16. 1. Sanfilippo F, Corredor C, Santonocito C, et al. Amiodarone or lidocaine for cardiac arrest: A  
11 systematic review and meta-analysis. Resuscitation. 2016;107:31-37.  
12 doi:10.1016/j.resuscitation.2016.07.235  
13  
14 17. Brown J, Goodridge D, Harrison A, Kemp J, Thorpe L, Weiler R. Medical Assistance in Dying:  
15 Patients', Families', and Health Care Providers' Perspectives on Access and Care Delivery. Journal  
16 of Palliative Medicine. 2020.  
17  
18 18. Hales BM, Bean S, Isenberg-Grzeda E, Ford B, Selby D. Improving the Medical Assistance in  
19 Dying (MAID) process: A qualitative study of family caregiver perspectives. Palliat Support Care.  
20 2019;17(5):590-5.  
21  
22  
23  
24  
25  
26  
27  
28  
29  
30  
31  
32  
33  
34  
35  
36  
37  
38  
39  
40  
41  
42  
43  
44  
45  
46  
47  
48  
49  
50  
51  
52  
53  
54  
55  
56  
57  
58  
59  
60

Confidential

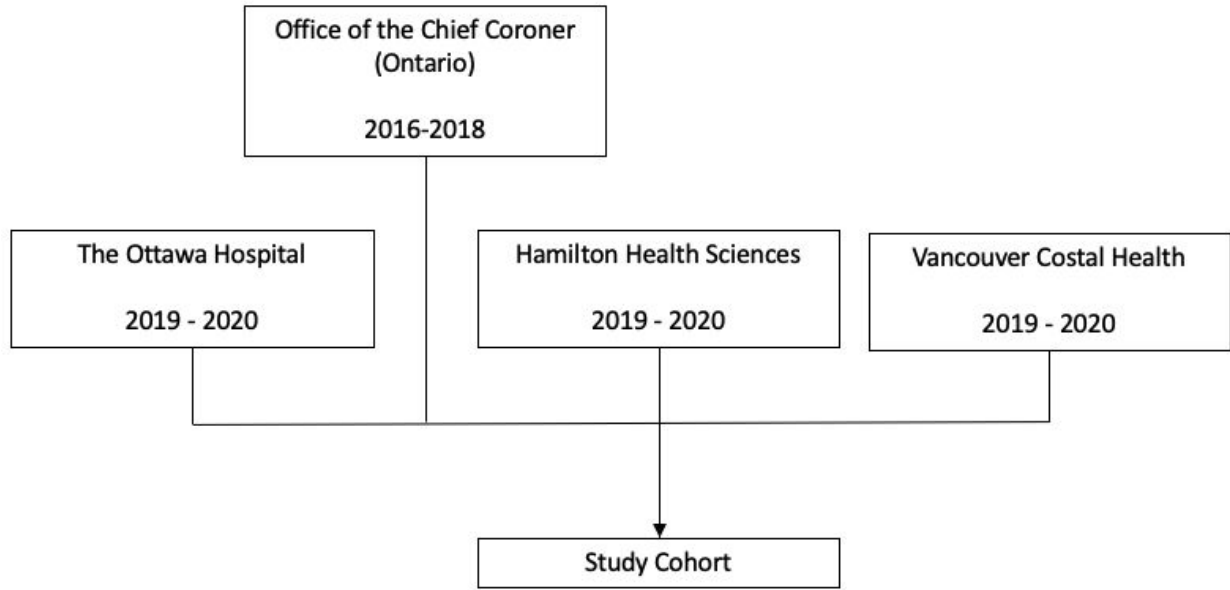

Figure 1. Patient flow diagram

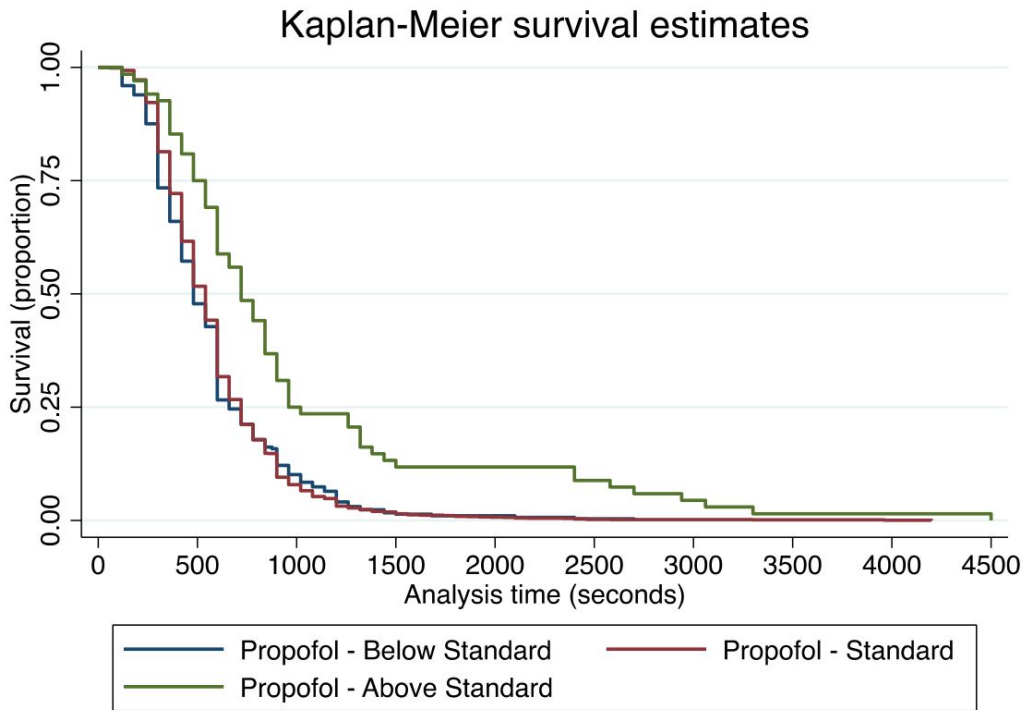

p < 0.001

Figure 2. Kaplan-Meier survival curve of mortality comparing difference dosages of propofol

Appendix Figure 1. Kaplan-Meier survival estimates for medications used in MAID

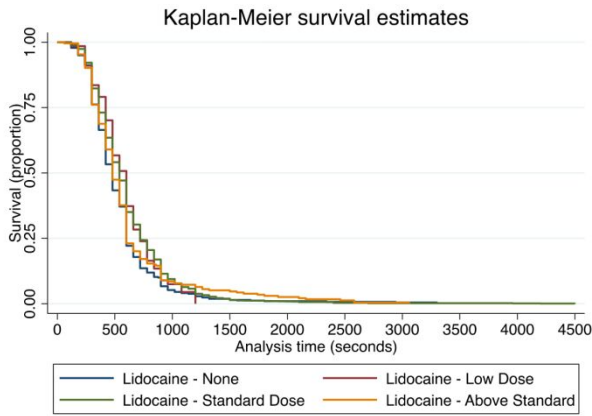

p=0.0001

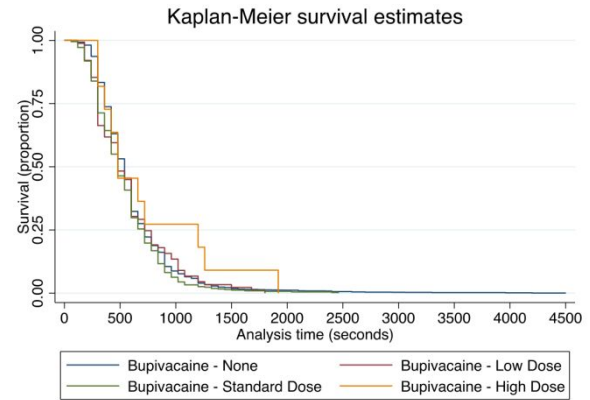

p=0.017

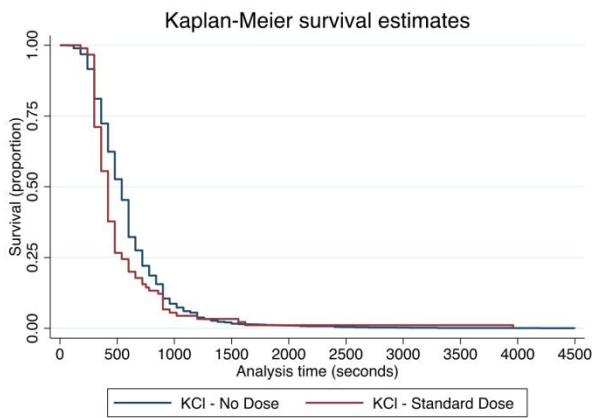

p = 0.3

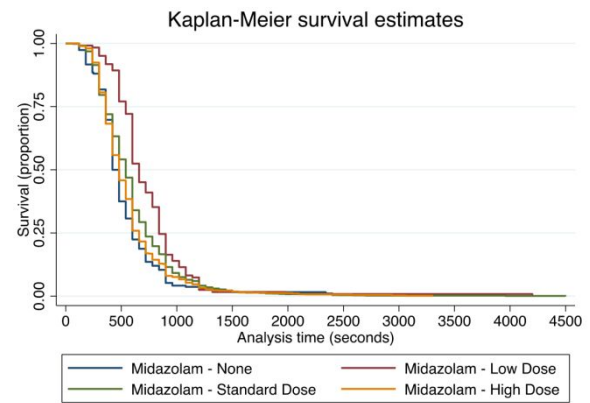

p < 0.001

1  
2  
3  
4  
5  
6  
7  
8  
9  
10  
11  
12  
13  
14  
15  
16  
17  
18  
19  
20  
21  
22  
23  
24  
25  
26  
27  
28  
29  
30  
31  
32  
33  
34  
35  
36  
37  
38  
39  
40  
41  
42  
43  
44  
45  
46  
47  
48  
49  
50  
51  
52  
53  
54  
55  
56  
57  
58  
59  
60

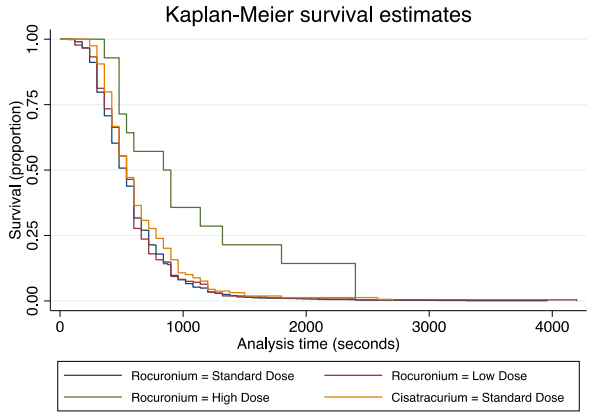

p = 0.0022

Confidential

**Appendix Table 1. Sensitivity Analysis: Multivariate Survival Analysis of Weibull Parametric Model with Medications and Dosages**

|                                                   | Hazard Ratio              | P       | 95% CI     |
|---------------------------------------------------|---------------------------|---------|------------|
| <b>Lidocaine (ref = no dose)</b>                  |                           |         |            |
| Low dose                                          | 0.8                       | 0.107   | 0.6 to 1   |
| Standard dose                                     | 0.7                       | < 0.001 | 0.6 to 0.8 |
| High dose                                         | 0.7                       | < 0.001 | 0.6 to 0.9 |
| <b>Propofol (ref = Low dose)</b>                  |                           |         |            |
| No dose                                           | Insufficient observations |         |            |
| Standard dose                                     | 1.1                       | 0.343   | 0.9 to 1.2 |
| High dose                                         | 0.4                       | < 0.001 | 0.3 to 0.5 |
| <b>Paralytic (ref = Rocuronium standard dose)</b> |                           |         |            |
| <b>Rocuronium</b>                                 |                           |         |            |
| Low dose                                          | 1.0                       | 0.800   | 0.9 to 1.1 |
| High dose                                         | 0.4                       | < 0.001 | 0.2 to 0.6 |
| <b>Cisatracurium</b>                              |                           |         |            |



|               |     |       |            |
|---------------|-----|-------|------------|
| Standard dose | 0.9 | 0.295 | 0.8 to 1.1 |
| Low dose      | 0.7 | 0.728 | 0.1 to 5   |
| High dose     | 0.4 | 0.075 | 0.1 to 1.1 |

**Bupivacaine (ref = no dose)**

|               |     |       |            |
|---------------|-----|-------|------------|
| Low dose      | 1.0 | 0.885 | 0.8 to 1.2 |
| Standard dose | 1.2 | 0.001 | 1.1 to 1.4 |
| High dose     | 0.6 | 0.083 | 0.3 to 1.1 |

**Potassium Chloride (ref = no dose)**

|               |     |         |            |
|---------------|-----|---------|------------|
| Low dose      | 1.3 | 0.626   | 0.5 to 3.4 |
| Standard dose | 1.5 | < 0.001 | 1.2 to 1.9 |
| High dose     | 0.6 | 0.285   | 0.3 to 1.5 |

Confidential
